1 **Nonsense-associated alternative splicing as a putative reno-protective mechanism in**  
2 ***Pkhd1<sup>cyli</sup>/Pkhd1<sup>cyli</sup>* mutant mice**

3  
4 Chaozhe Yang<sup>1</sup>, Naoe Harafuji<sup>1</sup>, Maryanne C. Odinakachukwu<sup>1</sup>, Ljubica Caldovic<sup>2</sup>, Ravindra Boddu<sup>3,4</sup>,  
5 Heather Gordish-Dressman<sup>1</sup>, Oded Foreman<sup>5,6</sup>, Eva M. Eicher<sup>6</sup> and Lisa M. Guay-Woodford<sup>1\*</sup>

6  
7 <sup>1</sup>Center for Translational Research, Children's National Research Institute, Washington, DC 20010

8 <sup>2</sup>Center for Genetic Medicine Research, Children's National Research Institute, Washington, DC 20010

9 <sup>3</sup>Division of Nephrology, Department of Medicine at the University of Alabama at Birmingham.  
10 Birmingham AL 35294

11 <sup>4</sup>Department of Pharmacology & Cancer Biology, Duke University School of Medicine, Durham, NC  
12 27710

13 <sup>5</sup>Genentech USA, Inc. South San Francisco, CA 94080

14 <sup>6</sup>The Jackson Laboratory, Bar Harbor, ME 04609

15  
16 Running Title: Characterization of the *cyli/cyli* mouse

17  
18 Key words: ARPKD, *Pkhd1*, mouse model, nonsense-associated alternative splicing, nonsense-  
19 mediated decay

20  
21  
22  
23 \*Corresponding author:

24 LGuaywoo@childrensnational.org (LG-W)

25 **Abstract**

26 Autosomal recessive polycystic kidney disease (ARPKD) is a hereditary hepato-renal fibrocystic disorder  
27 and a significant genetic cause of childhood morbidity and mortality. Mutations in the Polycystic Kidney  
28 and Hepatic Disease 1 (*PKHD1*) gene cause all typical forms of ARPKD. Several mouse strains carrying

29 diverse genetically engineered disruptions in the orthologous *Pkhd1* gene have been generated. The  
30 current study describes a novel spontaneous mouse recessive mutation causing a cystic liver phenotype  
31 resembling the hepato-biliary disease characteristic of human ARPKD. Here we describe mapping of the  
32 cystic liver mutation to the *Pkhd1* interval on Chromosome 1 and identification of a frameshift mutation  
33 within *Pkhd1* exon 48 predicted to result in premature translation termination. Mice homozygous for the  
34 new mutation, symbolized *Pkhd1<sup>cyli</sup>*, lack renal pathology, consistent with previously generated *Pkhd1*  
35 mouse mutants that fail to recapitulate human kidney disease. We have identified a profile of alternatively  
36 spliced *Pkhd1* renal transcripts that are distinct in normal versus mutant mice. The *Pkhd1* transcript profile  
37 in mutant kidneys is consistent with predicted outcomes of nonsense-associated alternative splicing  
38 (NAS) and nonsense mediated decay (NMD). Overall levels of *Pkhd1* transcripts in mutant mouse  
39 kidneys were reduced compared to kidneys of normal mice, and *Pkhd1* encoded protein in mutant  
40 kidneys was undetectable by immunoblotting. We suggest that in *Pkhd1<sup>cyli</sup>/Pkhd1<sup>cyli</sup>* (*cyli*) mice, mutation-  
41 promoted *Pkhd1* alternative splicing in the kidney yields transcripts encoding low-abundance protein  
42 isoforms lacking exon 48 encoded amino acid sequences that are sufficiently functional so as to attenuate  
43 expression of a renal cystic disease phenotype.

44

## 45 Introduction

46 Autosomal recessive polycystic kidney disease (ARPKD; MIM263200) is a hereditary hepato-  
47 renal fibrocystic disorder with an estimated incidence of 1 in 26,500 live births [1]. ARPKD is characterized  
48 by the formation of renal cysts affecting the collecting ducts, causing progressive renal insufficiency and  
49 ultimately end stage kidney disease in most patients [2, 3]. The disease also affects the liver with biliary  
50 plate malformations leading to portal hypertension and hepatic fibrosis [2, 3]. Virtually all cases of typical  
51 ARPKD are caused by mutations within the polycystic kidney and hepatic disease 1 (*PKHD1*) gene,  
52 located on chromosome 6p21.1 [4-6]. The full-length *PKHD1* transcript is composed of 67 exons with the  
53 longest open reading frame (ORF) encoding a 4,074 amino acid protein called fibrocystin or

54 fibrocystin/polyductin complex (FPC) [4, 5]. Despite the identification of *PKHD1* as the genetic  
55 determinant of ARPKD almost two decades ago, the function of FPC remains undefined.

56 Several orthologous mouse models of ARPKD have thus far been described (**Table 1**), primarily  
57 generated through random mutagenesis or targeted genetic engineering of the *Pkhd1* gene [7-14]. Most  
58 mutant *Pkhd1* mice exhibit a liver phenotype resembling human disease, but kidney cystic disease is  
59 either absent or very mild and slowly progressive [3]. The mouse *Pkhd1* locus, located on Chromosome  
60 1qA3-4, consists of 67 non-overlapping exons encoding a protein of 4,059 amino acids [15]. Human and  
61 mouse FPC share 87% overall identity across domains encompassing a predicted N-terminal signal  
62 peptide, multiple immunoglobulin-like plexin domains, multiple parallel  $\beta$ -helix 1 repeats and a single  
63 transmembrane domain. In contrast, the orthologous proteins share short C-terminal cytoplasmic  
64 domains that are only 40% identical [15, 16].

65 **Table 1. ARPKD orthologous mouse model phenotypes**

| Strain                              | Background       | Kidney            | Liver | Pancreas |
|-------------------------------------|------------------|-------------------|-------|----------|
| <i>Pkhd1<sup>lacZ</sup></i>         | 129S; B6         | PT dilatation     | DPM   | Cystic   |
| <i>Pkhd1<sup>LSL(-),Pk(+)</sup></i> | BALB/cJ, C57BL/6 | PT dilatation     | DPM   | Cystic   |
| <i>Pkhd1<sup>del2</sup></i>         | BALB/cJ, C57BL/6 | PT dilatation     | DPM   | Cystic   |
| <i>Pkhd1<sup>del3-4</sup></i>       | 129S; B6         | TAL/CD dilatation | DPM   | Cystic   |
| <i>Pkhd1<sup>del4</sup></i>         | 129S; B6         | None              | DPM   | Cystic   |
| <i>Pkhd1<sup>e15GFPdel16</sup></i>  | C57BL/6          | PT/MCD dilatation | DPM   | None     |
| <i>Pkhd1<sup>del40</sup></i>        | C57BL/6          | None              | DPM   | ----     |
| <i>Pkhd1<sup>cyli</sup></i>         | C57BL/6          | None              | DPM   | None     |
| <i>Pkhd1<sup>del67</sup></i>        | C57BL/6          | None              | None  | None     |

66 PT, Proximal tubule; TAL, thick ascending limb of Henle; MCD, medullary collecting duct; CD, collecting duct; DPM,  
67 ductal plate malformation.

68  
69 Mutation types and references: *Pkhd1<sup>lacZ</sup>*, exons 1-3 replaced by nLacZ/Neo insertion [12]; *Pkhd1<sup>LSL(-)</sup>*,  
70 LoxPSTOPLoxP (LSL) insertion in exon 2 & *Pkhd1<sup>Pk(+)</sup>*, Cre-mediated recombination of LSL [17]; *Pkhd1<sup>del2</sup>* exon 2  
71 deletion [8]; *Pkhd1<sup>del3-4</sup>* deletion of exons 3 and 4 [9]; *Pkhd1<sup>del4</sup>* exon 4 deletion [10], *Pkhd1<sup>e15GFPdel16</sup>* disruption of  
72 exon 15 and deletion of exon 16 [11], *Pkhd1<sup>del40</sup>* disruption of exon 40 leading to exon 40 “skipping” [7], *Pkhd1<sup>del67</sup>*  
73 exon 67 deletion [14].  
74

75 Numerous alternative *Pkhd1* transcripts have been reported [15-17] while the inventory of  
76 alternatively spliced human *PKHD1* transcripts appears to be less complex [18]. More than 20 alternative

77 *Pkhd1* transcripts were identified in wild-type (normal) mice [15, 16]. Several *Pkhd1* intronic and exonic  
78 splicing enhancers essential for proper *Pkhd1* splicing *in vitro* have been described [16]. Database  
79 analysis of *PKHD1* missense mutations associated with ARPKD (<http://www.humgen.rwth-aachen.de>)  
80 has identified sequence variants predicted to disrupt normal splicing, leading to premature protein  
81 termination [16].

82 Here we report discovery of the *Pkhd1*<sup>cyli</sup> mutation (hereafter, symbolized *cyli* for ease of  
83 presentation). We describe the phenotype of *cyli/cyli* mice, the mapping and identification of the disease  
84 gene, as well as comparative studies of *Pkhd1* transcript profiles and abundance in normal and *cyli/cyli*  
85 mice. The phenotype in *cyli/cyli* mice is consistent with what is observed in most other orthologous mouse  
86 models of human ARPKD; a largely liver-restricted cystic disease lacking renal involvement. The *cyli*  
87 mutation is an indel in exon 48 that results in a frameshift leading to premature protein termination. Kidney  
88 *Pkhd1* transcript profiles differed both qualitatively and quantitatively between normal and *cyli/cyli* mutant  
89 mice. Taken together, our observations suggest that the *cyli* mutation results in the activation of both  
90 nonsense-associated alternative splicing (NAS) [20-22] and nonsense-mediated decay (NMD) [22-27]  
91 mechanisms in mutant kidneys. We propose that in the *cyli/cyli* mouse, the absence of renal cystic  
92 disease is due to a combination of nonsense-associated alternative splicing (NAS) [20-22] that generates  
93 *Pkhd1* mRNAs lacking mutated exon 48, thereby avoiding premature protein termination, and NMD  
94 eliminating the majority of normally-spliced exon 48-containing transcripts. We suggest that the resulting  
95 *Pkhd1* transcript pool directs translation of FPC isoforms of low abundance but sufficient function to  
96 attenuate expression of a renal disease phenotype.

## 97 **Materials and Methods**

### 98 **Mice**

99 All protocols were approved by the Animal Care and Use Committees at The Jackson Laboratory,  
100 University of Alabama at Birmingham (UAB) and Children's National Research Institute. The study was  
101 conducted in accordance with the recommendations in the Guide for the Care and Use of Laboratory

102 Animals of the National Institutes of Health. The Jackson Laboratory, UAB, and the Research Animal  
103 Facility at Children's National Medical Center are fully accredited by the AAALAC.

104 The D.B/11Ei congenic mouse strain was generated by introgression of a segment of distal  
105 Chromosome 4 from C57BL/6J (B6) onto the DBA/2J background. The first affected mouse noted was a  
106 5 month-old D.B/11Ei female breeder, generation N11F13. This female had successfully raised two  
107 litters, was pregnant with a third litter, and appeared sick. Further investigation revealed a hardened,  
108 distended abdomen containing an enlarged liver with yellow, fluid-filled cysts. Liver disease was not  
109 evident in the male breeder. Offspring from this pair and closely related mice were monitored for signs  
110 of liver disease. These offspring were used to establish the D.B/11Ei strain carrying the defective gene  
111 and the results reported here derive from the original breeding pair.

112 The mice used in this study were first transferred to UAB and subsequently to Children's National  
113 Research Institute. Because affected mice survive into adulthood and are capable of reproducing, the  
114 *cyli* mutation is maintained in the D.B/11Ei homozygous *cyli* breeding colony.

## 115 **Locus mapping, gene identification and mutation sequencing**

116 A standard backcross mating scheme was used to identify the chromosomal location of the *cyli*  
117 gene [28-30]. F<sub>1</sub> females, produced by mating B6 to D.B/11Ei-*cyli* mice, were backcrossed to D.B/11Ei-  
118 *cyli* males. The backcross offspring (n = 221) were evaluated at 5 months of age for the presence of  
119 cystic liver disease. An initial genetic variant mapping approach and subsequent fine mapping studies  
120 were performed using MIT microsatellite markers [31]. The introgressed B6 segment on Chromosome 4  
121 was excluded as a candidate disease interval. A disease associated interval identified on Chromosome  
122 1 contained the *Pkhd1* locus, which was analyzed by DNA sequencing. *Pkhd1* exons and flanking intronic  
123 sequences were PCR amplified and the amplicons bi-directionally sequenced using primer sets  
124 (Supplementary Table 1) designed based upon the published sequence [15].

## 125 **Mouse genotyping**

126 DNA for genotyping was isolated from biopsied tail tissue. Tissue was lysed at 55°C in Cell Lysis  
127 Solution (Qiagen) containing Proteinase K (Qiagen), followed by protein precipitation with the Protein  
128 Precipitation Solution (Qiagen) for 10 min at -20 °C. The sample was then centrifuged at 16,000 x g for  
129 10 min at 4 °C. Genomic DNA was precipitated from the supernatant by addition of ethanol, pelleted by  
130 centrifugation at 16,000 x g for 5 min at 4 °C, air dried and resuspended in water. PCR-based genotyping  
131 was performed using primers 5'-TGG CTA TAC TGT GAA GAC CAG GCA-3' (forward) and 5'-AAG CTT  
132 GGG CCT ATC TGA ATG GCA-3' (reverse) and the following conditions: 15 min at 95 °C initial  
133 denaturation, followed by 35 cycles of 45 sec denaturation at 94 °C, 45 sec annealing at 52 °C and 1 min  
134 extension at 72 °C; with a 10 min final extension at 72 °C. PCR products were digested with *Bsa*I and the  
135 products resolved by agarose gel electrophoresis. Bands of 126 bp and 359 bp were diagnostic of normal  
136 genotype. A 484 bp band identified the *cyl*i mutant allele.

## 137 **Tissue histology and morphometric analysis**

138 Kidneys and livers harvested from 1, 2, 4 and 6 month old male and female normal and *cyl*i mice  
139 were paraffin embedded, sectioned, deparaffinized, rehydrated and stained with hematoxylin and eosin  
140 according to standard protocols [32-35]. Stained tissue sections were examined by light microscopy using  
141 an Olympus CX41 microscope equipped with a Leica DX320 color camera using Leica software.  
142 Histomorphometry was performed on blinded experimental specimens by a veterinary pathologist  
143 according to previously described protocols [36]. Images were collected using a Nikon E600 microscope  
144 equipped with a SPOT Insight digital camera (Diagnostic Instruments) and analyzed using Image-Pro  
145 Plus v6.2 image analysis software (Media Cybernetics Inc). Cyst and tissue areas were quantified by  
146 converting images to gray-scale and thresholding them to produce a black image on a white background.  
147 Cysts were represented as white objects within the image. Cystic and total (including cysts) areas were  
148 determined automatically using the count/size and macro functions of Image-Pro Plus. The results were  
149 expressed as % of cyst area relative to total area.

150 To investigate the course of disease in D.B/11Ei-*cyli* mice, the mice were weaned at 3 weeks of  
151 age and assigned to a specific age group. To investigate liver disease progression in females as a  
152 function of litter parity, 3 sib mated pairs were assigned to be investigated after the birth of their first litter,  
153 and 3 sib-mated pairs were assigned to be investigated after the birth of their second litter.

## 154 **Reverse transcription (RT)-PCR and quantitative (q)RT-PCR**

155 Total RNA samples from kidneys and livers harvested from 7-week-old normal and *cyli* mice were  
156 prepared using RNeasy Mini kit (Qiagen, # 74104), treated with RQ1 RNase-Free DNase (Promega, #  
157 M6101) and then re-purified using the RNeasy Mini kit. For RT-PCR, RNA samples were reverse  
158 transcribed using SuperScript III First-Strand Synthesis SuperMix (Thermo Fisher Scientific, # 18080400)  
159 and oligo dT primers. RT-PCR to compare *Pkhd1* transcript “profiles” between normal and *cyli* kidney  
160 and liver tissue was performed using primers specific for *Pkhd1* exons 1 (forward: 5'-CAT TTG AGG CAC  
161 AAG GCT GAC ACA-3') and 67 (reverse: 5'-CTG AGG TCT GGG CGT AAC AG-3') sequences. Relative  
162 *Pkhd1* transcript abundance in normal vs. *cyli* kidneys was determined by quantitative real-time PCR  
163 performed on a QuantStudio 7 Flex Real-Time PCR System (Thermo Fisher Scientific) using the default  
164 program. The PCR was performed on cDNA templates using Power SYBR Green PCR Master Mix  
165 (Thermo Fisher Scientific, # 4368706) and primers specific for sequences in *Pkhd1* exons 48-49 (forward:  
166 5'-TGG CTA TAC TGT GAA GAC CA-3'; reverse: 5'-GAT CCA AGA GCA GAG CCA TC-3'), *Pkhd1* exons  
167 61-62 (forward: 5'-TCA CTC TTG AGA TGC CTG GC-3'; reverse: 5'-AGG TTC CCA GTT ATT AAA CTA  
168 C-3') and *Pkhd1* exons 66-67 (forward: 5'-CCA GAA GAC ATA TCT GAA TCC CAG GC-3'; reverse: 5'-  
169 AGC AAG AGA TCC TGG AAC ACA GGT-3'). *Beta-actin* was used for normalization (forward: 5'-GGA  
170 GGG GCC GGA CTC ATC GTA CTC-3'; reverse: 5'-CCG CAT CCT CTT CCT CCC TGG AGA A-3') [16].  
171 Results were analyzed using QuantStudio Real-Time PCR Software and the  $\Delta\Delta C_t$  method [37].

## 172 **Immunoblotting**

173 Kidneys were collected from 14-day old normal and *cyli* mice and immediately snap frozen in  
174 liquid nitrogen. Kidneys were homogenized on ice for 20 sec in 1 ml ice-cold RIPA buffer (Sigma-Aldrich



175 # R0278) containing proteinase inhibitors (Protease Inhibitor Cocktail Mini-Tablet EDTA-free, Bimake #  
176 B14012). Homogenates were centrifuged for 10 min at 15,000 × g at 4 °C. BCA protein assays (Thermo  
177 Scientific # 23227) were performed on supernatants. Twenty µg of total protein was mixed with NuPAGE  
178 LDS sample buffer (Life Technologies, # NP0007) containing sample reducing agent (Life Technologies,  
179 # NP0009). Samples were heated at 100 °C for 10 min prior to electrophoresis through a Novex NuPAGE  
180 4–12 % Bis-Tris gel (Life Technologies, # NP0335BOX) in MES SDS running buffer (Life Technologies,  
181 # NP0002) for 30 min at 200 V. Proteins were transferred to a polyvinylidene fluoride membrane using a  
182 Bio-Rad Trans-Blot Turbo Transfer System. The membrane was incubated with rat anti-mouse FPC  
183 monoclonal antibody [14] in 1× PBS plus 0.1 % Tween-20 (PBST) with 5 % bovine serum albumin  
184 overnight at 4 °C. The membrane was washed 3 times with 1× PBST, 10 min per wash, then incubated  
185 with goat anti-rat secondary antibody (Thermo Fisher Scientific # 31475 1:5000 dilution in 1× PBST with  
186 5% non-fat dry milk) for 1 hour at room temperature, followed by 3 washes with 1× PBST. Immunoreactive  
187 bands were detected using SuperSignal West Dura chemiluminescent substrate (Thermo Fisher  
188 Scientific, # 34076) and imaged using a Bio-Rad ChemiDoc MP Imaging System.

189

## 190 **Results**

### 191 **Discovery of the *Pkhd1*<sup>*cyli/cyli*</sup> mutant mouse**

192 Investigation of an apparently sick D.B/11 female mouse revealed an enlarged liver containing  
193 multiple fluid-filled cysts. Subsequently shown to be a stably transmitted recessive trait, the spontaneous  
194 mutation was designated cystic liver (*cyli*). Homozygous *cyli* mutant mice developed cystic liver disease  
195 by two months of age. Histopathological analysis (**Fig. 1A**) demonstrated biliary dysgenesis  
196 characterized by ductal plate malformation phenocopying the liver lesion characteristic of human ARPKD,  
197 with portal tracts of affected livers exhibiting multiple irregularly shaped and variably dilated bile ducts  
198 generally lined with a hyperplastic epithelium. Histopathologic evidence of renal cystic disease was not  
199 observed in *cyli* homozygous mice examined at one, two, four and six months of age (data not shown).



200

201 **Figure 1. Characterization of the *cyli/cyli* mouse model. (A)** Kidney (top) and liver (middle and bottom)  
202 tissue sections stained with hematoxylin and eosin from 2-month-old normal and *cyli/cyli* mice. Bottom  
203 panels are higher magnification views of boxed areas in middle panels (BD, Bile duct; C, cortex; M,  
204 Medulla; PV, Portal vein). Scale bar = 100  $\mu$ m. **(B)** Schematic illustrating the position of the *cyli* mutation  
205 (affecting the *Pkhd1* locus) on mouse Chromosome 1 between the genetic markers *D1Mit168* and  
206 *D1Mit231* (genetic distances in centiMorgan (cM) units). **(C)** Sequence comparison of *Pkhd1* from normal  
207 and *cyli* mice (c.7588\_7589delGGinsT, p. L2545fs, where nucleotide A of the translation initiation codon  
208 ATG in NM\_153179.3 is +1 in *Pkhd1* exon 48). **(D)** Comparison of normal and *cyli* reading frames.  
209 Mutation leads to premature protein termination in the *cyli/cyli* mouse.

210

## 211 **Gene identification and mutation analysis**

212 The disease locus was positioned on Chromosome 1 between markers *D1Mit168* and *D1Mit231*  
213 (*D1Mit168* - 0.9 cM – *cyli* - 1.3 cM – *D1Mit231*), in an interval containing the *Pkhd1* gene. **(Fig. 1B)**.  
214 Sequence analysis of the *Pkhd1* gene in *cyli/cyli* mice identified a deletion/insertion mutation in *Pkhd1*  
215 exon 48; c.7588\_7589delGGinsT, p. L2545fs (where nucleotide A of the translation initiation codon ATG  
216 in NM\_153179.3 is +1) **(Fig. 1C)** leading to a frameshift and premature stop codon within exon 48, 44 bp  
217 downstream of the T insertion **(Fig. 1D)**.

218

## 219 **Progressive liver disease linked to gender, age and parity**

220 Morphometric analysis of liver sections from female and male *cyli/cyli* mice at multiple time points  
221 revealed an age-associated increase in phenotypic severity, indicating progressive liver disease.  
222 Younger *cyli/cyli* mice (less than 2-months-old) displayed a pre-cystic liver phenotype characterized by  
223 dilated bile ducts radiating from the portal region into the parenchyma **(Fig. 1 and Table 2)**. Older mice

224 displayed coalescing cysts that progressively replaced increasing areas of the normal parenchyma.  
 225 Beyond 4 months of age, female mice tended to exhibit more extensive cystic lesions than male mice of  
 226 comparable age (**Table 2**). Severity of the liver phenotype in females also was correlated with increased  
 227 parity (**Fig. 2 and Table 2**). The current study did not extend phenotypic examination of mice beyond 6  
 228 months of age.

229 **Table 2. Progressive cystic liver disease in *Pkhd1<sup>cyli/cyli</sup>* mice**

| Age (days) | Gender         | N | Phenotype                        |                          | Parity |
|------------|----------------|---|----------------------------------|--------------------------|--------|
|            |                |   | Histomorphology                  | Cystic area (% of total) |        |
| 6          | M              | 4 | Hyperplastic bile ducts          | N/A                      | --     |
|            | F              | 3 |                                  |                          | 0      |
| 26         | M              | 3 | Dilated bile ducts               | N/A                      | --     |
|            | F              | 5 |                                  |                          | 0      |
| 43         | M              | 3 | Hyperplastic, dilated bile ducts | N/A                      | --     |
|            | F              | 3 |                                  |                          | 0      |
| 74         | M              | 2 | Coalescing cystic bile ducts     | 20-25                    | --     |
|            | F <sub>n</sub> | 2 |                                  | 15-20                    | 0      |
| 99-110     | M              | 3 | Coalescing cystic bile ducts     | 25-35                    | --     |
|            | F <sub>p</sub> | 3 |                                  | 20-35                    | 1      |
| 142-184    | M              | 4 | Coalescing cystic bile ducts     | 30-70                    | --     |
|            | F <sub>p</sub> | 4 |                                  | 50-80                    | 2      |

230 F<sub>n</sub>, Female, nulliparous; F<sub>p</sub>, Female, parous

231

232 **Figure 2. Progressive cystic liver phenotype in *cyli/cyli* mutants.** Hematoxylin and eosin stained liver  
 233 sections from representative *cyli/cyli* female mice, where P#0, P#1, P#2 and P#3 denote numbers of  
 234 litters produced by mutant females. Scale bar = 200 μm.

235

## 236 Differential *Pkhd1* transcript profiles in normal vs. *cyli/cyli* mice

237 There are relatively few alternatively spliced human *PKHD1* transcripts. In contrast, non-mutant  
 238 mouse *Pkhd1* is subject to extensive alternative splicing in the kidney but not in the liver, and longer  
 239 transcripts typically include exon 48 (location of the *cyli* mutation) [16].

240 Therefore, we compared the profiles of *Pkhd1* transcripts amplified from *cyli/cyli* and normal  
241 kidneys and livers (**Fig. 3A**) using RT-PCR and primers specific for *Pkhd1* exons 1 and 67. Consistent  
242 with previously published findings [16], we identified four major amplification products of 12, 6.5, 4.5 and  
243 2.5 kbp (plus some additional minor bands) representing the full-length and alternatively spliced *Pkhd1*  
244 mRNAs from normal kidneys (**Fig. 3A, lane 3**) [16]. In normal liver, again in accordance with previous  
245 observations [16], we observed a 12 kbp amplification product (**Fig. 3A, lane 4**) while cDNA derived from  
246 the *cyli/cyli* liver yielded a 12 kbp amplicon as well as a 4.5 kbp band (**Figure 3A, lane 2**). The presence  
247 of this 4.5 kbp band is consistent with previous observations of a *Pkhd1* derived amplicon of this size  
248 from both normal liver and kidney [16]. Our RT-PCR analysis of normal and *cyli/cyli* liver samples  
249 inconsistently generated this amplicon, possibly reflecting very low transcript abundance.

250

251 **Figure 3. *Pkhd1* expression in normal and *cyli/cyli* mice. (A)** *Pkhd1* transcript profiles in liver and  
252 kidneys of normal and *cyli/cyli* mice represented by PCR products (amplicons) generated from oligo-dT  
253 primed template cDNA using primers specific for *Pkhd1* exons 1 and 67. Smaller bands in lane 9  
254 (Plasmid) represent nonspecific or plasmid recombination-derived amplification products. **(B)** Relative  
255 expression of *Pkhd1* mRNA containing exons 48-49, 61-62 and 66-67 in the kidneys of normal and  
256 *cyli/cyli* mice. Data were normalized to *beta actin* mRNA; expression of *Pkhd1* mRNA in normal mouse  
257 kidneys was set as 1.00. Data are expressed as mean  $\pm$  S.E; n=5 per group. Statistical analysis was  
258 performed using a non-parametric Wilcoxon sign rank test. \*P< 0.05 vs. normal. **(C)** Western blot  
259 detection of normal and *cyli/cyli* mouse kidney FPC protein detected using a monoclonal primary antibody  
260 specific for *Pkhd1* exon 67 encoded amino acid sequences. Only full-length FPC was observed in normal  
261 kidney protein extracts, and no FPC was detected in extracts of *cyli/cyli* kidneys. Results of duplicate  
262 experiments are shown. Low molecular weight bands (arrowheads) correspond to IgH and IgL chains  
263 detected by anti-mouse secondary antibody reagent.

264

265 Sequence analysis of the kidney amplicons indicated that while most transcripts represented in  
266 the 12 and 6.5 kbp bands included exon 48, this exon was excluded in transcripts represented in bands  
267 of 4.5 and 2.5 kbp. As noted, the *cyli/cyli* kidney yielded only two predominant amplification products of  
268 4.5 and 2.5 kbp, along with a relatively faint 12 kbp and additional minor bands (**Fig. 3A, lane 1**). We  
269 used qRT-PCR and primer-pairs specific for junctions spanning exons 48-49, 61-62 and 66-67 and  
270 examined whether the differential amplicon profiles reflected exclusion of exon 48 from the population of  
271 *cyli/cyli* derived mRNAs. We observed significantly lower levels of these targeted amplicons in *cyli/cyli*  
272 vs. normal kidneys (**Fig. 3B**), consistent with NMD activity. In addition, detection of *Pkhd1<sup>cyli</sup>* amplicons  
273 using an exon 48 specific primer indicates that NAS did not result in a complete absence of mutant exon  
274 48 containing transcripts. Therefore, we propose that a combination of NAS and NMD-mediated  
275 mechanisms may differentially enhance the proportion of *Pkhd1* transcripts lacking exon 48 in *cyli/cyli*  
276 kidneys as compared to normal kidneys.

277 We also investigated expression of the *Pkhd1* encoded protein, FPC, in normal and *cyli/cyli*  
278 kidneys, using an antibody generated against an exon 67 encoded epitope (rat monoclonal antibody  
279 PD1E1, kindly provided by the Baltimore PKD Center) (**Fig. 3C**). This antibody detected full-length FPC  
280 in protein extracts only from normal kidneys. In contrast, the full-length FPC was not detected in extracts  
281 prepared from *cyli/cyli* kidneys, as expected given the nature of the *cyli* mutation. Possible lower  
282 molecular weight FPC isoforms also were not observed, a result consistent with our qRT-PCR findings  
283 of significantly reduced levels of *Pkhd1* mRNA in *cyli/cyli* kidneys, resulting in FPC abundance below the  
284 threshold level of immunoreagent detection.

285

## 286 Discussion

287 The mouse *cyli* mutation arose spontaneously due to a *de novo* deletion/insertion  
288 (c.7588\_7589delGGinsT) in exon 48 of the *Pkhd1* gene, which is predicted to be a frame shift mutation  
289 leading to premature protein termination. Similar to other *Pkhd1* gene-targeted mouse models, the

290 *cyli/cyli* mutants express a hepato-biliary phenotype that progresses with age and in females, disease  
291 severity is accelerated by increasing parity. In the inbred D.B/11Ei congenic line, the *cyli* mutation is not  
292 associated with a renal cystic phenotype. That said, a mild renal cystic phenotype can be observed when  
293 other gene-targeted *Pkhd1* mutations are expressed on mixed genetic backgrounds or when mutant mice  
294 are aged for more than 12 months. For example, homozygotes carrying the *Pkhd1*<sup>C642\*</sup> truncating  
295 mutation do not have imaging evidence for either kidney or liver disease in the first 6-months of life.  
296 However, by ~1.5 years of age, female *Pkhd1*<sup>C642\*</sup> heterozygotes, as well as homozygotes, develop  
297 radiographic changes resembling medullary sponge kidney. Interestingly, histopathological analysis  
298 demonstrates that the renal tubular ectasia in these mutant kidneys involves the proximal tubule rather  
299 than the collecting duct, a pattern that recapitulates the earliest ARPKD-associated renal cystic lesion in  
300 human fetuses [38].

301 With all the mouse models described to date, the most striking feature is the minimal renal  
302 phenotype associated with homozygous *Pkhd1* frameshift and truncating mutations. In comparison,  
303 similar human *PKHD1* mutations typically cause severe renal cystic disease that is expressed in fetuses  
304 and infants [3]. In the specific example of exon 48, the *cyli* frameshift mutation is not associated with  
305 renal cystic disease in 6-month old mice, whereas human patients with frameshift mutations involving  
306 *PKHD1* exon 48 have the classic ARPKD phenotype with renal cystic disease expressed in infancy  
307 (<http://www.humgen.rwth-aachen.de>) [39].

308 We suggest that nonsense-associated alternative splicing (NAS) may in part explain the species-  
309 specific absence of renal cystogenesis in the *cyli* model, and perhaps other engineered *Pkhd1* mutations.  
310 The mouse *Pkhd1* gene, unlike its human orthologue, is transcriptionally complex in the kidney with a  
311 number of alternatively spliced isoforms. Whereas in the liver, *Pkhd1* has minimal transcriptional  
312 complexity and the full length *Pkhd1* transcript predominates [4, 16]. In *cyli/cyli* mutant kidneys, we  
313 detected only the lower molecular weight 2.5 and 4.5 kb amplicons, consisting largely of putative  
314 transcripts lacking exon 48. Sequence analyses in a previous report [16] and data from this study  
315 demonstrate that these lower molecular weight amplicons contain isoforms that involve exon-skipping

316 events, but maintain the FPC open reading frame (ORF). For example, the 2.5 kb amplicon contains a  
317 putative isoform with splicing from exon 6 to 61; similarly, among the transcripts in the 4.5 kb amplicon,  
318 alternative splicing events involve exon 4 to 49 and exon 6 to either 51, 52 or 53 (**Fig. 4**). Therefore, a  
319 diverse set of alternative *Pkhd1* splice forms, generated by NAS, could encode multiple novel isoforms  
320 of FPC with sufficient residual function to impede renal cystogenesis in mutant mice. In contrast, the  
321 mutant liver with limited alternative splicing would not have similar functional redundancy, resulting in  
322 development of the hepato-biliary lesion. In addition, amplicons from the *cyli/cyli* kidney did not totally  
323 exclude exon 48, suggesting the possibility that cryptic splice site(s) could be activated within the exon,  
324 resulting in a lower expression of transcripts containing exon 48, but maintaining the ORF and thus  
325 evading NMD mechanisms.

326

327 **Figure 4. *Pkhd1* transcript structure.** Schematic shows the exons in the longest ORF encoding major  
328 functional protein coding domains. The ORF is preserved when splicing occurs between exons with  
329 similar configurations (like-to-like colored/shaped exon boundaries), e.g. exon 6 to 7; exon 6 to 48, which  
330 could generate both the longest ORF transcript and alternatively spliced transcripts. The *cyli* mutation  
331 and resulting downstream premature termination codon is indicated by the red **X**).

332

333 At the protein level, western blot analysis detected only full-length FPC in kidneys of normal mice.  
334 In contrast, no protein bands of any size were observed in immunoblots of *cyli/cyli* mouse kidney protein  
335 extracts. This observation is consistent with the reduced levels of *Pkhd1* gene expression demonstrated  
336 by qRT-PCR analysis of *cyli/cyli* kidney and leaves open the possibility that variant transcripts give rise  
337 to very low abundance isoforms of functional FPC, undetectable on western blots but capable of  
338 preventing a cystic kidney phenotype. Previous polysome-based analyses indicate that the *Pkhd1* splice  
339 variants are indeed translated in normal kidney [16].

340 While the basis for *PKHD1/Pkhd1* species-specific differences in renal disease expression is not  
341 fully understood, differences in phenotypic severity between orthologous human disease and mouse

342 models are not uncommon. For example, the *mdx* mouse model of Duchenne muscular dystrophy (DMD)  
343 has a mild phenotype compared to human DMD patients [40]. Although *mdx* mice exhibit muscle  
344 histopathology, elevated plasma pyruvate kinase and creatine kinase levels and muscle weakness similar  
345 to DMD patients, *mdx* mice are viable and fertile [40] whereas human DMD is a fatal degenerative muscle  
346 disorder [41]. Mouse models of human cystic fibrosis (CF) deficient for cystic fibrosis transmembrane  
347 conductance regulator (*CFTR*) also fail to fully recapitulate the human disease [42]. More than 10 CF  
348 mouse models have been created and although they exhibit fluid secretion defects and develop severe  
349 intestinal and mild pancreatic disease, they fail to develop the signature lung infections that are the major  
350 cause of mortality in human CF [43-46]. The basis for this species-specific difference in lung phenotype  
351 involves pH differences in the airway surface liquid (ASL) in human CF patients vs. mouse models [47].

352 We speculate that the minimal renal cystic disease in mouse *Pkhd1* models reflects a combination  
353 of mechanisms. One mechanism, exemplified by the *cyli/cyli* mutant characterized in the present study,  
354 is *genetic* in nature and involves the *Pkhd1* mutation itself triggering NAS to drive increased proportional  
355 representation of *Pkhd1* mRNAs lacking mutated exon 48 sequences, which direct translation of low-  
356 abundance but functionally competent FPC isoforms, thus preventing kidney disease. A second  
357 mechanism, reflecting *molecular interactions*, which may be dictated by genetic background rather than  
358 *Pkhd1* genotype *per se*, might act to modulate the degree to which a kidney phenotype is expressed.  
359 Variations in molecular interactions could also account for the well-documented effects of genetic  
360 background on kidney phenotypes displayed by multiple mouse *Pkhd1* models [9, 48, 49]. Finally, we  
361 speculate that FPC functions differently in regulatory pathways in the mouse and human. Mice  
362 homozygous for the *Pkhd1* exon 67 deletion (*Pkhd1<sup>del67</sup>*), which removes most of the FPC carboxy  
363 terminus domain, have no renal or biliary phenotype [14], whereas mice lacking virtually the entire *Pkhd1*  
364 locus (exons 3 through 67) express the hepatobiliary lesion, but only a minor renal phenotype in older  
365 mice [17, 50]. The corresponding defects in human patients, involving loss of a functional carboxy  
366 terminus [39] or large deletions intragenic deletions [51, 52] are associated with both the hepatobiliary  
367 lesion and severe renal cystic disease.



368 As noted above for CF, identifying specific mechanisms underlying discordant phenotypes  
369 between human genetic disease and orthologous mouse mutant models can yield valuable insights into  
370 novel therapeutic targets and potential treatment strategies [47]. Although the physiological function of  
371 FPC remains undefined, we anticipate that continued study of *Pkhd1* mutant mouse models will increase  
372 understanding of the mechanism(s) underlying mouse resistance to the severe renal disease that  
373 characterizes human ARPKD. Defining such mechanisms, in turn, could yield potential new targets for  
374 prevention and treatment of this devastating disease.

375

## 376 **Acknowledgments**

377 The authors thank members of the Guay-Woodford laboratory for helpful advice. Adam Richman  
378 (Center for Translational Research) assisted with writing and editing of the manuscript and Amber K.  
379 O'Connor (akoWriting LLC) provided editorial assistance. We thank Trenton R. Schoeb, DVM, PhD (UAB  
380 Comparative Pathology Laboratory) for assisting with the histopathological analysis.

381 The authors also thank members of the Eicher laboratory, including Linda L. Washburn for help  
382 throughout the project, Lisa Somes for maintaining the D.B/11Ei-*cyli* strain and providing mice for  
383 pathology studies, and Leona Gagnon and Andrew Rechnagle for isolating DNA and establishing DNA  
384 plates for mapping. In addition, we thank Douglas McMinimy, The Jackson Laboratory, for conducting a  
385 genome scan to determine the chromosomal position of *cyli*.

386

387

## 388 **References**

- 389 1. Alzarka B, Morizono H, Bollman JW, Kim D, Guay-Woodford LM. Design and Implementation of the  
390 Hepatorenal Fibrocystic Disease Core Center Clinical Database: A Centralized Resource for  
391 Characterizing Autosomal Recessive Polycystic Kidney Disease and Other Hepatorenal Fibrocystic

- 392 Diseases. *Frontiers in pediatrics*. 2017;5:80. Epub 2017/05/06. doi: 10.3389/fped.2017.00080.  
393 PubMed PMID: 28473971; PubMed Central PMCID: PMC5397503.
- 394 2. Guay-Woodford LM, Bissler JJ, Braun MC, Bockenhauer D, Cadnapaphornchai MA, Dell KM, et al.  
395 Consensus expert recommendations for the diagnosis and management of autosomal recessive  
396 polycystic kidney disease: report of an international conference. *The Journal of pediatrics*.  
397 2014;165(3):611-7. Epub 2014/07/13. doi: 10.1016/j.jpeds.2014.06.015. PubMed PMID: 25015577;  
398 PubMed Central PMCID: PMC4723266.
- 399 3. Bergmann C, Guay-Woodford LM, Harris PC, Horie S, Peters DJM, Torres VE. Polycystic kidney  
400 disease. *Nat Rev Dis Primers*. 2018;4(1):50. Epub 2018/12/14. doi: 10.1038/s41572-018-0047-y.  
401 PubMed PMID: 30523303; PubMed Central PMCID: PMC6592047.
- 402 4. Onuchic LF, Furu L, Nagasawa Y, Hou X, Eggermann T, Ren Z, et al. PKHD1, the polycystic kidney  
403 and hepatic disease 1 gene, encodes a novel large protein containing multiple immunoglobulin-like  
404 plexin-transcription-factor domains and parallel beta-helix 1 repeats. *American journal of human  
405 genetics*. 2002;70(5):1305-17. Epub 2002/03/19. doi: 10.1086/340448. PubMed PMID: 11898128;  
406 PubMed Central PMCID: PMC447605.
- 407 5. Ward CJ, Hogan MC, Rossetti S, Walker D, Sneddon T, Wang X, et al. The gene mutated in  
408 autosomal recessive polycystic kidney disease encodes a large, receptor-like protein. *Nature  
409 genetics*. 2002;30(3):259-69. Epub 2002/03/29. doi: 10.1038/ng833. PubMed PMID: 11919560.
- 410 6. Xiong H, Chen Y, Yi Y, Tsuchiya K, Moeckel G, Cheung J, et al. A novel gene encoding a TIG  
411 multiple domain protein is a positional candidate for autosomal recessive polycystic kidney disease.  
412 *Genomics*. 2002;80(1):96-104. Epub 2002/06/25. doi: 10.1006/geno.2002.6802. PubMed PMID:  
413 12079288.
- 414 7. Moser M, Matthiesen S, Kirfel J, Schorle H, Bergmann C, Senderek J, et al. A mouse model for  
415 cystic biliary dysgenesis in autosomal recessive polycystic kidney disease (ARPKD). *Hepatology  
416 (Baltimore, Md)*. 2005;41(5):1113-21. Epub 2005/04/15. doi: 10.1002/hep.20655. PubMed PMID:  
417 15830394.

- 418 8. Woollard JR, Punyashtiti R, Richardson S, Masyuk TV, Whelan S, Huang BQ, et al. A mouse model  
419 of autosomal recessive polycystic kidney disease with biliary duct and proximal tubule dilatation.  
420 *Kidney international*. 2007;72(3):328-36. Epub 2007/05/24. doi: 10.1038/sj.ki.5002294. PubMed  
421 PMID: 17519956.
- 422 9. Garcia-Gonzalez MA, Menezes LF, Piontek KB, Kaimori J, Huso DL, Watnick T, et al. Genetic  
423 interaction studies link autosomal dominant and recessive polycystic kidney disease in a common  
424 pathway. *Human molecular genetics*. 2007;16(16):1940-50. Epub 2007/06/19. doi:  
425 10.1093/hmg/ddm141. PubMed PMID: 17575307; PubMed Central PMCID: PMCPMC2085232.
- 426 10. Gallagher AR, Esquivel EL, Briere TS, Tian X, Mitobe M, Menezes LF, et al. Biliary and pancreatic  
427 dysgenesis in mice harboring a mutation in *Pkhd1*. *The American journal of pathology*.  
428 2008;172(2):417-29. Epub 2008/01/19. doi: 10.2353/ajpath.2008.070381. PubMed PMID:  
429 18202188; PubMed Central PMCID: PMCPMC2312372.
- 430 11. Kim I, Fu Y, Hui K, Moeckel G, Mai W, Li C, et al. Fibrocystin/polyductin modulates renal tubular  
431 formation by regulating polycystin-2 expression and function. *J Am Soc Nephrol*. 2008;19(3):455-  
432 68. Epub 2008/02/01. doi: 10.1681/ASN.2007070770. PubMed PMID: 18235088; PubMed Central  
433 PMCID: PMCPMC2391052.
- 434 12. Williams SS, Cobo-Stark P, James LR, Somlo S, Igarashi P. Kidney cysts, pancreatic cysts, and  
435 biliary disease in a mouse model of autosomal recessive polycystic kidney disease. *Pediatric  
436 nephrology (Berlin, Germany)*. 2008;23(5):733-41. Epub 2008/02/21. doi: 10.1007/s00467-007-  
437 0735-4. PubMed PMID: 18286309.
- 438 13. Hu B, He X, Li A, Qiu Q, Li C, Liang D, et al. Cystogenesis in ARPKD results from increased  
439 apoptosis in collecting duct epithelial cells of *Pkhd1* mutant kidneys. *Experimental cell research*.  
440 2011;317(2):173-87. Epub 2010/09/30. doi: 10.1016/j.yexcr.2010.09.012. PubMed PMID:  
441 20875407.
- 442 14. Outeda P, Menezes L, Hartung EA, Bridges S, Zhou F, Zhu X, et al. A novel model of autosomal  
443 recessive polycystic kidney questions the role of the fibrocystin C-terminus in disease mechanism.

- 444 Kidney international. 2017;92(5):1130-44. Epub 2017/07/22. doi: 10.1016/j.kint.2017.04.027.  
445 PubMed PMID: 28729032; PubMed Central PMCID: PMC6005173.
- 446 15. Nagasawa Y, Matthiesen S, Onuchic LF, Hou X, Bergmann C, Esquivel E, et al. Identification and  
447 characterization of Pkhd1, the mouse orthologue of the human ARPKD gene. *J Am Soc Nephrol*.  
448 2002;13(9):2246-58. PubMed PMID: 12191969.
- 449 16. Boddu R, Yang C, O'Connor AK, Hendrickson RC, Boone B, Cui X, et al. Intragenic motifs regulate  
450 the transcriptional complexity of Pkhd1/PKHD1. *J Mol Med (Berl)*. 2014;92(10):1045-56. Epub  
451 2014/07/06. doi: 10.1007/s00109-014-1185-7. PubMed PMID: 24984783; PubMed Central PMCID:  
452 PMC4197071.
- 453 17. Bakeberg JL, Tammachote R, Woollard JR, Hogan MC, Tuan HF, Li M, et al. Epitope-tagged Pkhd1  
454 tracks the processing, secretion, and localization of fibrocystin. *J Am Soc Nephrol*.  
455 2011;22(12):2266-77. Epub 2011/10/25. doi: 10.1681/ASN.2010111173. PubMed PMID:  
456 22021705; PubMed Central PMCID: PMC3250208.
- 457 18. Frank V, Zerres K, Bergmann C. Transcriptional complexity in autosomal recessive polycystic  
458 kidney disease. *Clinical journal of the American Society of Nephrology : CJASN*. 2014;9(10):1729-  
459 36. Epub 2014/08/12. doi: 10.2215/CJN.00920114. PubMed PMID: 25104275; PubMed Central  
460 PMCID: PMC4186505.
- 461 19. Wang S, Zhang J, Nauli SM, Li X, Starremans PG, Luo Y, et al. Fibrocystin/polyductin, found in the  
462 same protein complex with polycystin-2, regulates calcium responses in kidney epithelia. *Molecular  
463 and cellular biology*. 2007;27(8):3241-52. Epub 2007/02/07. doi: 10.1128/MCB.00072-07. PubMed  
464 PMID: 17283055; PubMed Central PMCID: PMC1899915.
- 465 20. Wang J, Chang YF, Hamilton JI, Wilkinson MF. Nonsense-associated altered splicing: a frame-  
466 dependent response distinct from nonsense-mediated decay. *Molecular cell*. 2002;10(4):951-7.  
467 Epub 2002/11/07. doi: 10.1016/s1097-2765(02)00635-4. PubMed PMID: 12419238.
- 468 21. Sui T, Song Y, Liu Z, Chen M, Deng J, Xu Y, et al. CRISPR-induced exon skipping is dependent  
469 on premature termination codon mutations. *Genome Biol*. 2018;19(1):164. Epub 2018/10/20. doi:

- 470 10.1186/s13059-018-1532-z. PubMed PMID: 30333044; PubMed Central PMCID:  
471 PMCPMC6193291.
- 472 22. Lambert JM, Srour N, Delpy L. The Yin and Yang of RNA surveillance in B lymphocytes and  
473 antibody-secreting plasma cells. *BMB Rep.* 2019;52(12):671-8. Epub 2019/10/18. PubMed PMID:  
474 31619318; PubMed Central PMCID: PMCPMC6941761.
- 475 23. Chang YF, Imam JS, Wilkinson MF. The nonsense-mediated decay RNA surveillance pathway.  
476 *Annual review of biochemistry.* 2007;76:51-74. Epub 2007/03/14. doi:  
477 10.1146/annurev.biochem.76.050106.093909. PubMed PMID: 17352659.
- 478 24. Kurosaki T, Popp MW, Maquat LE. Quality and quantity control of gene expression by nonsense-  
479 mediated mRNA decay. *Nat Rev Mol Cell Biol.* 2019;20(7):406-20. Epub 2019/04/18. doi:  
480 10.1038/s41580-019-0126-2. PubMed PMID: 30992545; PubMed Central PMCID:  
481 PMCPMC6855384.
- 482 25. Karousis ED, Muhlemann O. Nonsense-Mediated mRNA Decay Begins Where Translation Ends.  
483 *Cold Spring Harb Perspect Biol.* 2019;11(2). Epub 2018/06/13. doi: 10.1101/cshperspect.a032862.  
484 PubMed PMID: 29891560.
- 485 26. Somashekar PH, Upadhyai P, Shukla A, Girisha KM. Novel splice site and nonsense variants in  
486 INVS cause infantile nephronophthisis. *Gene.* 2020;729:144229. Epub 2019/11/11. doi:  
487 10.1016/j.gene.2019.144229. PubMed PMID: 31706999.
- 488 27. da Costa PJ, Menezes J, Romao L. The role of alternative splicing coupled to nonsense-mediated  
489 mRNA decay in human disease. *Int J Biochem Cell Biol.* 2017;91(Pt B):168-75. doi:  
490 10.1016/j.biocel.2017.07.013. PubMed PMID: 28743674.
- 491 28. Guay-Woodford LM, Bryda EC, Christine B, Lindsey JR, Collier WR, Avner ED, et al. Evidence that  
492 two phenotypically distinct mouse PKD mutations, bpk and jcpk, are allelic. *Kidney international.*  
493 1996;50(4):1158-65. Epub 1996/10/01. doi: 10.1038/ki.1996.423. PubMed PMID: 8887273.

- 494 29. Guay-Woodford LM, Wright CJ, Walz G, Churchill GA. Quantitative trait loci modulate renal cystic  
495 disease severity in the mouse bpk model. *J Am Soc Nephrol.* 2000;11(7):1253-60. Epub  
496 2000/06/23. PubMed PMID: 10864581.
- 497 30. Mrug M, Zhou J, Yang C, Aronow BJ, Cui X, Schoeb TR, et al. Genetic and Informatic Analyses  
498 Implicate Kif12 as a Candidate Gene within the Mpkd2 Locus That Modulates Renal Cystic Disease  
499 Severity in the Cys1cpk Mouse. *PloS one.* 2015;10(8):e0135678. Epub 2015/08/22. doi:  
500 10.1371/journal.pone.0135678. PubMed PMID: 26295839; PubMed Central PMCID:  
501 PMC4546649.
- 502 31. Rhodes M, Straw R, Fernando S, Evans A, Lacey T, Dearlove A, et al. A high-resolution  
503 microsatellite map of the mouse genome. *Genome Res.* 1998;8(5):531-42. Epub 1998/05/20. doi:  
504 10.1101/gr.8.5.531. PubMed PMID: 9582196.
- 505 32. Mrug M, Zhou J, Woo Y, Cui X, Szalai AJ, Novak J, et al. Overexpression of innate immune  
506 response genes in a model of recessive polycystic kidney disease. *Kidney international.*  
507 2008;73(1):63-76. Epub 2007/10/26. doi: 10.1038/sj.ki.5002627. PubMed PMID: 17960140.
- 508 33. Chase TH, Cox GA, Burzenski L, Foreman O, Shultz LD. Dysferlin deficiency and the development  
509 of cardiomyopathy in a mouse model of limb-girdle muscular dystrophy 2B. *Am J Pathol.*  
510 2009;175(6):2299-308. Epub 2009/10/31. doi: 10.2353/ajpath.2009.080930. PubMed PMID:  
511 19875504; PubMed Central PMCID: PMC2789639.
- 512 34. Zhou J, Ouyang X, Cui X, Schoeb TR, Smythies LE, Johnson MR, et al. Renal CD14 expression  
513 correlates with the progression of cystic kidney disease. *Kidney international.* 2010;78(6):550-60.  
514 Epub 2010/06/18. doi: 10.1038/ki.2010.175. PubMed PMID: 20555320; PubMed Central PMCID:  
515 PMC3422025.
- 516 35. Shan D, Rezonzew G, Mullen S, Roye R, Zhou J, Chumley P, et al. Heterozygous Pkhd1(C642\*)  
517 mice develop cystic liver disease and proximal tubule ectasia that mimics radiographic signs of  
518 medullary sponge kidney. *American journal of physiology Renal physiology.* 2019;316(3):F463-F72.

- 519 Epub 2019/01/03. doi: 10.1152/ajprenal.00181.2018. PubMed PMID: 30600684; PubMed Central  
520 PMCID: PMCPMC6442377.
- 521 36. Zhou J, Ouyang X, Schoeb TR, Bolisetty S, Cui X, Mrug S, et al. Kidney injury accelerates  
522 cystogenesis via pathways modulated by heme oxygenase and complement. *J Am Soc Nephrol*.  
523 2012;23(7):1161-71. Epub 2012/04/21. doi: 10.1681/ASN.2011050442. PubMed PMID: 22518005;  
524 PubMed Central PMCID: PMCPMC3380643.
- 525 37. Livak KJ, Schmittgen TD. Analysis of relative gene expression data using real-time quantitative  
526 PCR and the 2(-Delta Delta C(T)) Method. *Methods*. 2001;25(4):402-8. doi:  
527 10.1006/meth.2001.1262. PubMed PMID: 11846609.
- 528 38. Avner ED, Studnicki FE, Young MC, Sweeney WE, Jr., Piesco NP, Ellis D, et al. Congenital murine  
529 polycystic kidney disease. I. The ontogeny of tubular cyst formation. *Pediatric nephrology (Berlin,*  
530 *Germany)*. 1987;1(4):587-96. Epub 1987/10/01. doi: 10.1007/BF00853593. PubMed PMID:  
531 3153336.
- 532 39. Sharp AM, Messiaen LM, Page G, Antignac C, Gubler MC, Onuchic LF, et al. Comprehensive  
533 genomic analysis of PKHD1 mutations in ARPKD cohorts. *Journal of medical genetics*.  
534 2005;42(4):336-49. Epub 2005/04/05. doi: 10.1136/jmg.2004.024489. PubMed PMID: 15805161;  
535 PubMed Central PMCID: PMCPMC1736033.
- 536 40. Bulfield G, Siller WG, Wight PA, Moore KJ. X chromosome-linked muscular dystrophy (mdx) in the  
537 mouse. *Proc Natl Acad Sci U S A*. 1984;81(4):1189-92. Epub 1984/02/01. doi:  
538 10.1073/pnas.81.4.1189. PubMed PMID: 6583703; PubMed Central PMCID: PMCPMC344791.
- 539 41. Emery AEH. *Duchenne Muscular Dystrophy* Oxford: Oxford University Press; 1993.
- 540 42. Riordan JR, Rommens JM, Kerem B, Alon N, Rozmahel R, Grzelczak Z, et al. Identification of the  
541 cystic fibrosis gene: cloning and characterization of complementary DNA. *Science*.  
542 1989;245(4922):1066-73. Epub 1989/09/08. doi: 10.1126/science.2475911. PubMed PMID:  
543 2475911.



- 544 43. Guilbault C, Saeed Z, Downey GP, Radzioch D. Cystic fibrosis mouse models. *Am J Respir Cell*  
545 *Mol Biol.* 2007;36(1):1-7. Epub 2006/08/05. doi: 10.1165/rcmb.2006-0184TR. PubMed PMID:  
546 16888286.
- 547 44. Fisher JT, Zhang Y, Engelhardt JF. Comparative biology of cystic fibrosis animal models. *Methods*  
548 *Mol Biol.* 2011;742:311-34. Epub 2011/05/07. doi: 10.1007/978-1-61779-120-8\_19. PubMed PMID:  
549 21547741; PubMed Central PMCID: PMCPMC3617920.
- 550 45. Lavelle GM, White MM, Browne N, McElvaney NG, Reeves EP. Animal Models of Cystic Fibrosis  
551 Pathology: Phenotypic Parallels and Divergences. *Biomed Res Int.* 2016;2016:5258727. Epub  
552 2016/06/25. doi: 10.1155/2016/5258727. PubMed PMID: 27340661; PubMed Central PMCID:  
553 PMCPMC4908263.
- 554 46. Semaniakou A, Croll RP, Chappe V. Animal Models in the Pathophysiology of Cystic Fibrosis. *Front*  
555 *Pharmacol.* 2018;9:1475. Epub 2019/01/22. doi: 10.3389/fphar.2018.01475. PubMed PMID:  
556 30662403; PubMed Central PMCID: PMCPMC6328443.
- 557 47. Shah VS, Meyerholz DK, Tang XX, Reznikov L, Abou Alaiwa M, Ernst SE, et al. Airway acidification  
558 initiates host defense abnormalities in cystic fibrosis mice. *Science (New York, NY.*  
559 *2016;351(6272):503-7.* Epub 2016/01/30. doi: 10.1126/science.aad5589. PubMed PMID:  
560 26823428; PubMed Central PMCID: PMCPMC4852973.
- 561 48. Lager DJ, Qian Q, Bengal RJ, Ishibashi M, Torres VE. The pck rat: a new model that resembles  
562 human autosomal dominant polycystic kidney and liver disease. *Kidney international.*  
563 *2001;59(1):126-36.* Epub 2001/01/03. doi: 10.1046/j.1523-1755.2001.00473.x. PubMed PMID:  
564 11135065.
- 565 49. O'Meara CC, Hoffman M, Sweeney WE, Jr., Tsaih SW, Xiao B, Jacob HJ, et al. Role of genetic  
566 modifiers in an orthologous rat model of ARPKD. *Physiological genomics.* 2012;44(15):741-53.  
567 Epub 2012/06/07. doi: 10.1152/physiolgenomics.00187.2011. PubMed PMID: 22669842; PubMed  
568 Central PMCID: PMCPMC3774585.

- 569 50. Olson RJ, Hopp K, Wells H, Smith JM, Furtado J, Constans MM, et al. Synergistic Genetic  
570 Interactions between Pkhd1 and Pkd1 Result in an ARPKD-Like Phenotype in Murine Models. *J*  
571 *Am Soc Nephrol*. 2019;30(11):2113-27. Epub 2019/08/21. doi: 10.1681/ASN.2019020150. PubMed  
572 PMID: 31427367; PubMed Central PMCID: PMC6830782.
- 573 51. Bergmann C, Senderek J, Windelen E, Kupper F, Middeldorf I, Schneider F, et al. Clinical  
574 consequences of PKHD1 mutations in 164 patients with autosomal-recessive polycystic kidney  
575 disease (ARPKD). *Kidney international*. 2005;67(3):829-48. Epub 2005/02/09. doi: 10.1111/j.1523-  
576 1755.2005.00148.x. PubMed PMID: 15698423.
- 577 52. Zvereff V, Yao S, Ramsey J, Mikhail FM, Vijzelaar R, Messiaen L. Identification of PKHD1 multiexon  
578 deletions using multiplex ligation-dependent probe amplification and quantitative polymerase chain  
579 reaction. *Genetic testing and molecular biomarkers*. 2010;14(4):505-10. Epub 2010/06/26. doi:  
580 10.1089/gtmb.2009.0188. PubMed PMID: 20575693.

581

Figure 1

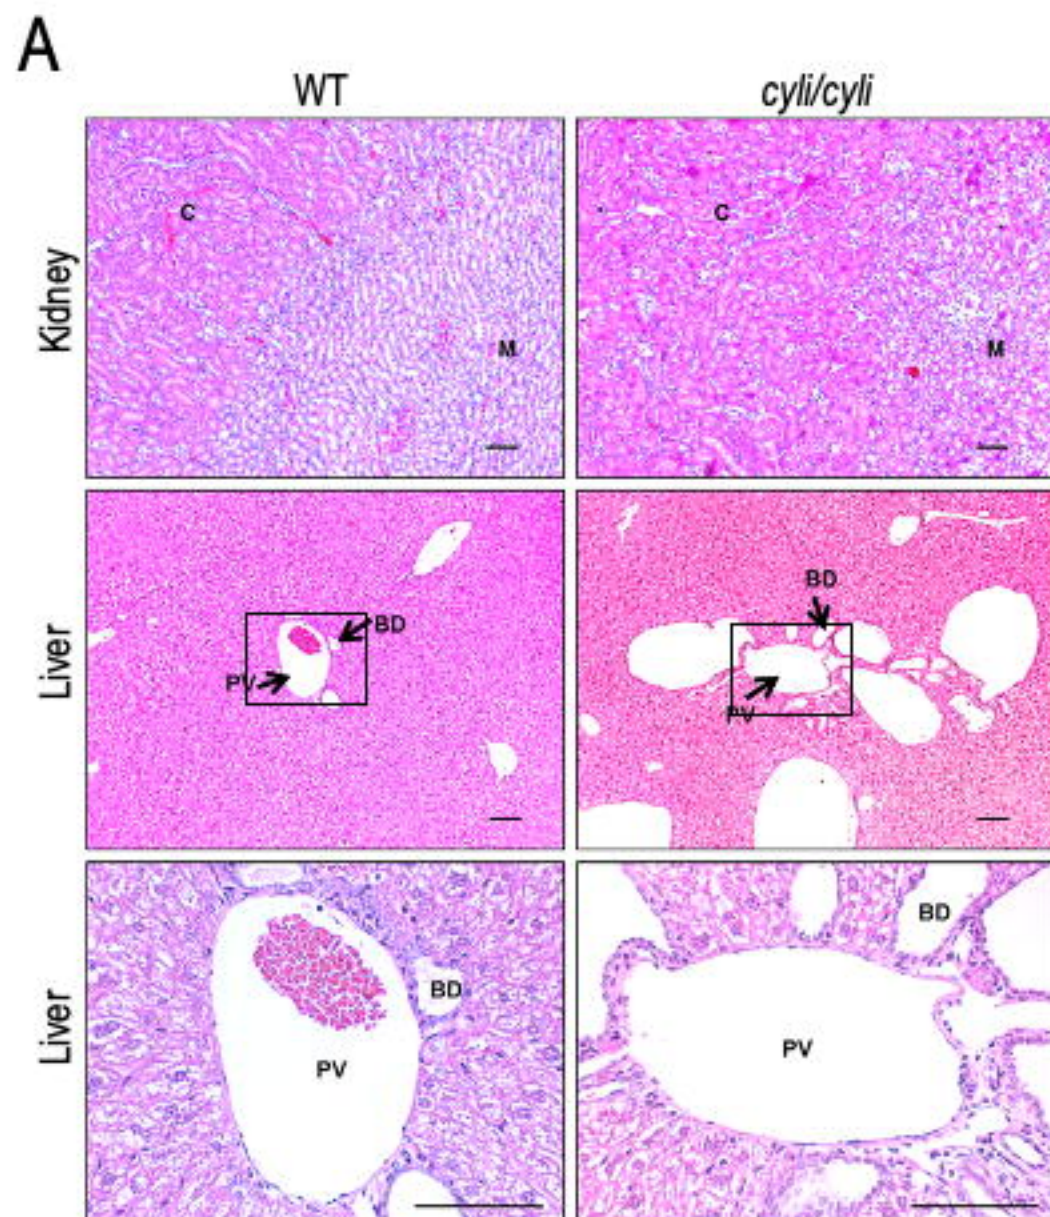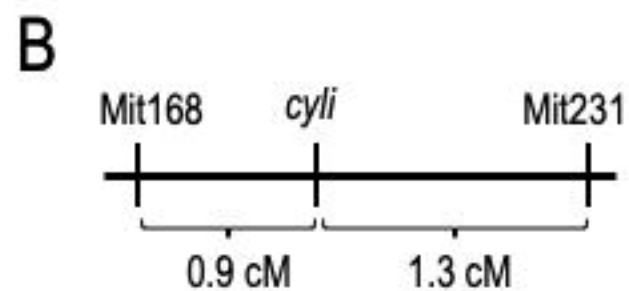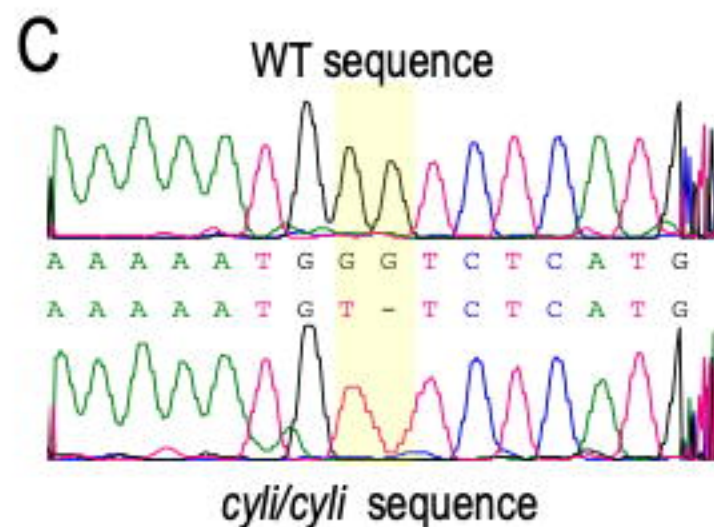

**D**

|             |     |     |            |     |     |     |     |            |     |     |
|-------------|-----|-----|------------|-----|-----|-----|-----|------------|-----|-----|
| WT          | ... | aat | ggg        | tct | cat | gtt | ctt | gca        | tct | atg |
|             |     | N   | G          | S   | H   | V   | L   | A          | S   | M   |
| <i>cyli</i> | ... | aat | <b>gT-</b> | tct | cat | gtt | ctt | gca        | tct | atg |
|             |     | N   | V          | L   | M   | F   | L   | H          | L   | W   |
| WT          | gaa | acc | ctc        | tca | gac | aca | tgc | ttg        | acc | ... |
|             | E   | T   | L          | S   | D   | T   | C   | L          | T   |     |
| <i>cyli</i> | gaa | acc | ctc        | tca | gac | aca | tgc | <b>ttg</b> | acc | ... |
|             | K   | P   | S          | Q   | T   | H   | A   | *          |     |     |

Figure 2

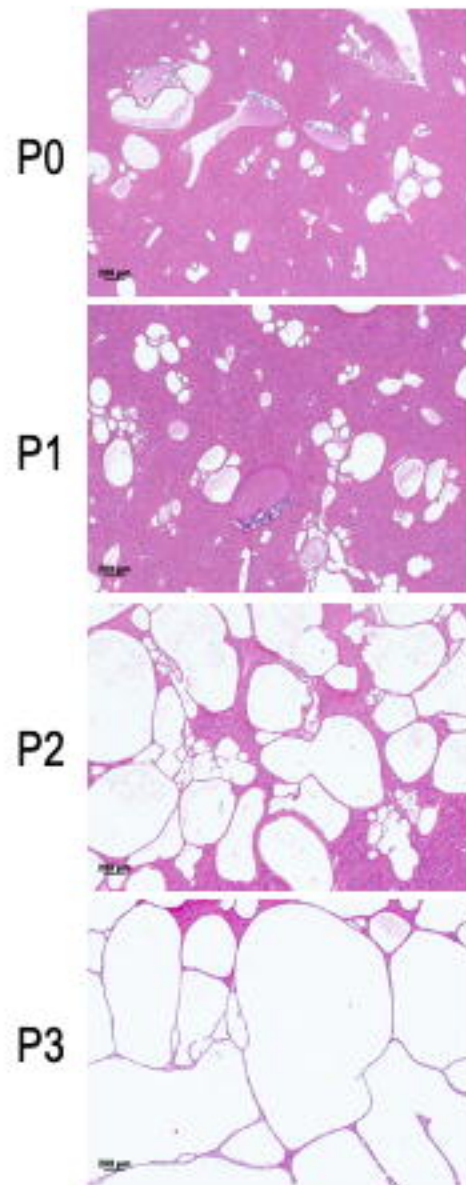

Figure 3

A

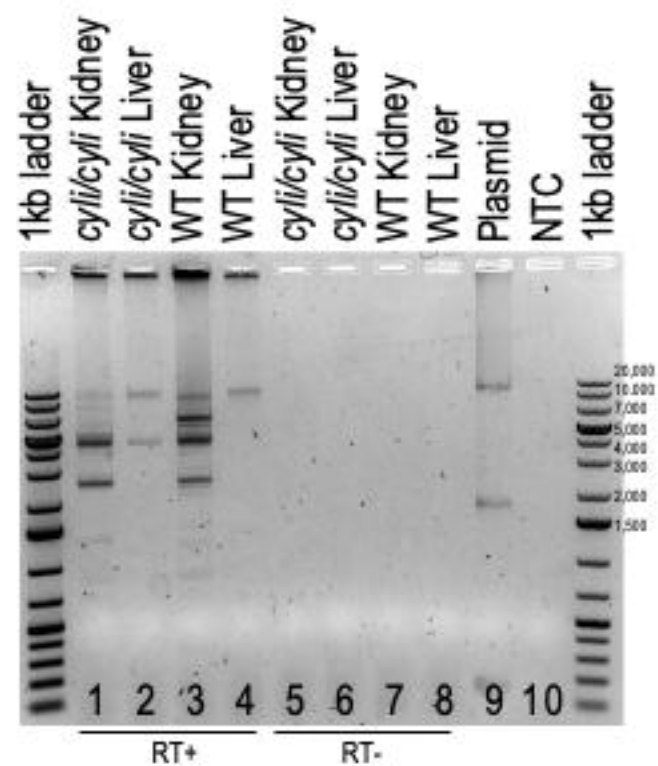

B

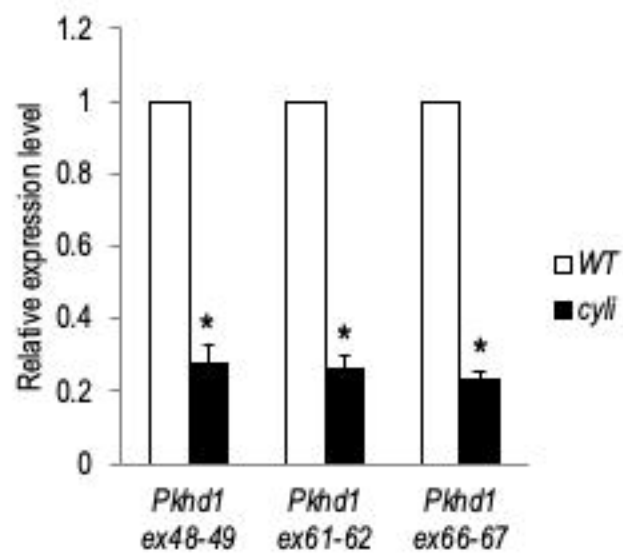

C

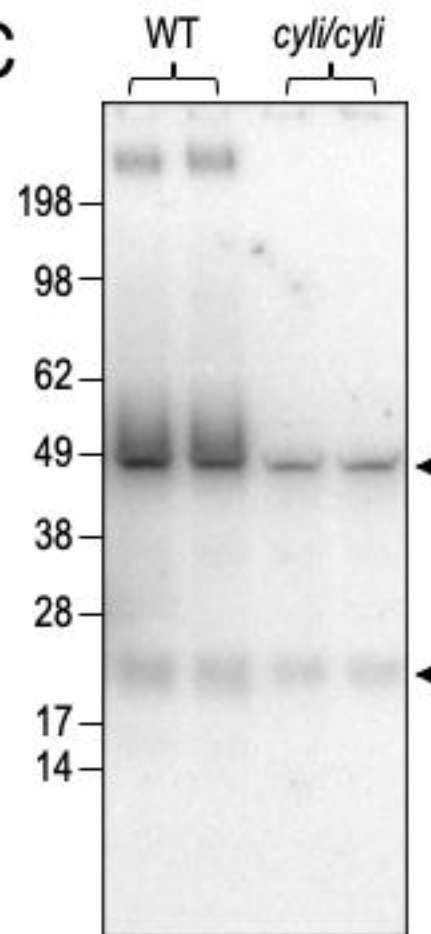



# Figure 4

mPkh1 (4059aa)

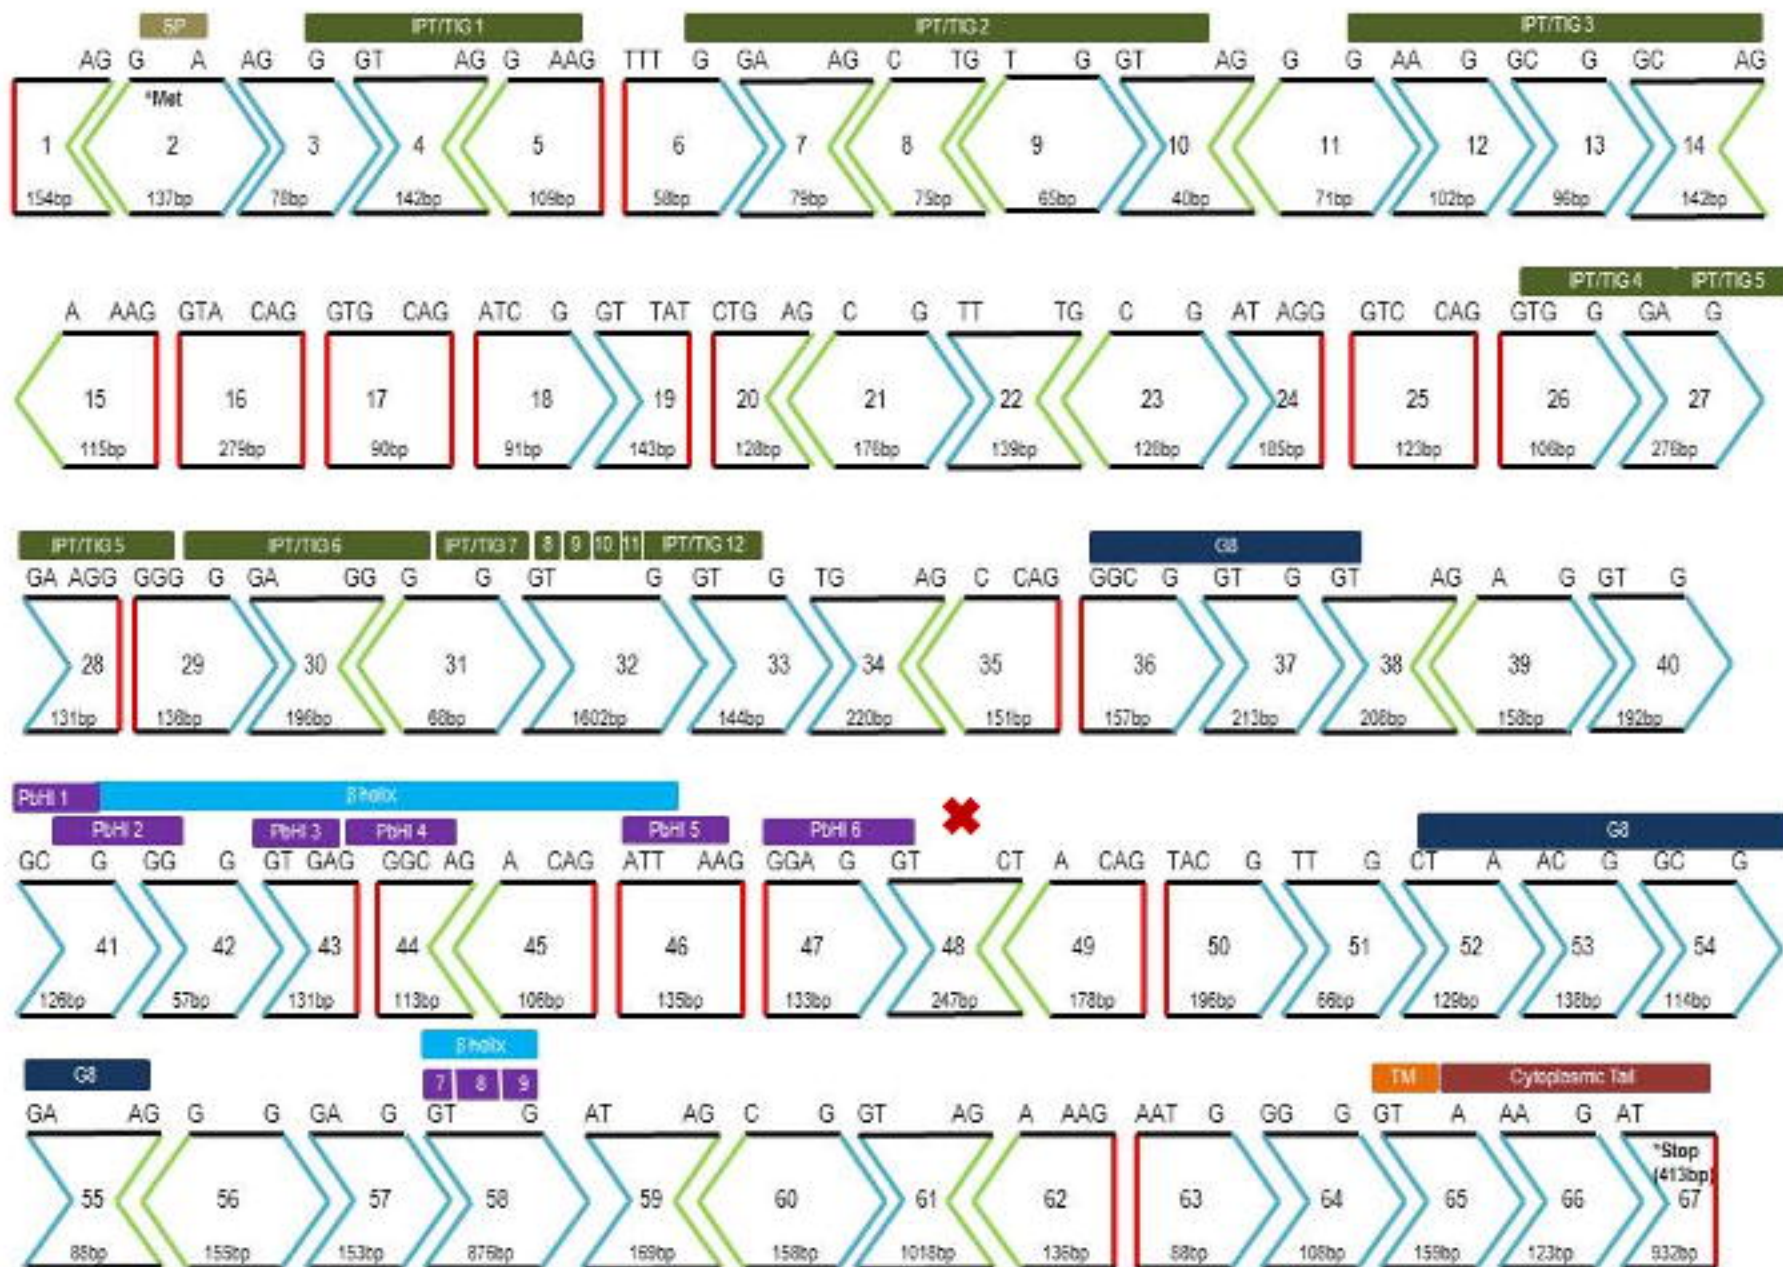

Source: https://www.biorxiv.org/content/10.1101/2021.09.22.461297v1.full.pdf
